# Supplementary material for: Dietary Interventions for Gout and Effect on Cardiovascular Risk Factors: A Systematic Review
Source: MDPI journal article supplement (doi:10.3390/nu11122955), 2019-12-04
Supplement: s1 [file s1]

## **Supplementary Information**

### **PubMed Session Results (28 Nov 2017)**

[Mesh] = Medical subject headings

[Mesh:NoExp] = Medical subject headings without explosion

[Majr] = Medical subject headings as main topic

[tiab] = words in title or abstract or author keywords

[ti] = words in title

| #  | Query                                                                                                                                                                                                                                                                                                                                                                                                                                                                                                                                                                                                                                                                                                                                                                                                                                                                                                                                                                                                                                                                                          | Results   |
|----|------------------------------------------------------------------------------------------------------------------------------------------------------------------------------------------------------------------------------------------------------------------------------------------------------------------------------------------------------------------------------------------------------------------------------------------------------------------------------------------------------------------------------------------------------------------------------------------------------------------------------------------------------------------------------------------------------------------------------------------------------------------------------------------------------------------------------------------------------------------------------------------------------------------------------------------------------------------------------------------------------------------------------------------------------------------------------------------------|-----------|
| #9 | #8 NOT ("Animals"[Mesh] NOT "Humans"[Mesh])                                                                                                                                                                                                                                                                                                                                                                                                                                                                                                                                                                                                                                                                                                                                                                                                                                                                                                                                                                                                                                                    | 857       |
| #8 | #6 OR #7                                                                                                                                                                                                                                                                                                                                                                                                                                                                                                                                                                                                                                                                                                                                                                                                                                                                                                                                                                                                                                                                                       | 936       |
| #7 | #3 AND #5                                                                                                                                                                                                                                                                                                                                                                                                                                                                                                                                                                                                                                                                                                                                                                                                                                                                                                                                                                                                                                                                                      | 731       |
| #6 | #3 AND #4                                                                                                                                                                                                                                                                                                                                                                                                                                                                                                                                                                                                                                                                                                                                                                                                                                                                                                                                                                                                                                                                                      | 422       |
| #5 | "Cardiovascular Diseases"[Mesh] OR "Cholesterol"[Mesh] OR cardiovascular disease*[tiab] OR cvd[tiab] OR coronary disease*[tiab] OR heart disease*[tiab] OR atherosclerosis[tiab] OR arteriosclerosis[tiab] OR hypertension[tiab] OR blood pressure[tiab] OR cholesterol*[tiab] OR stroke*[tiab] OR peripheral vascular disease*[tiab] OR peripheral arterial disease*[tiab] OR hypercholesterol*[tiab] OR hyperlipid*[tiab] OR hyper-lipid*[tiab] OR "Overweight"[Mesh] OR obese*[tiab] OR overweight*[tiab] OR obesit*[tiab] OR "Body Mass Index"[Mesh] OR "body mass index"[tiab] OR bmi[tiab] OR "Metabolic Diseases"[Mesh:noexp] OR "Glucose Metabolism Disorders"[Mesh] OR "Dyslipidemias"[Mesh] OR dyslipidemia*[tiab] OR dys-lipidemia*[tiab] OR dyslipidaemia*[tiab] OR dys-lipidaemia*[tiab] OR insulin resistanc*[tiab] OR insuline resistanc*[tiab] OR Hyperglycemia*[tiab] OR Hyper-glycemia*[tiab] OR Hyperglycaemia*[tiab] OR Hyper-glycaemia*[tiab] OR cardiovascular event*[tiab] OR cardiovascular risk*[tiab] OR cardio-vascular event*[tiab] OR cardio-vascular risk*[tiab] | 3,274,667 |
| #4 | "Uric Acid"[Majr] OR uric acid[ti]                                                                                                                                                                                                                                                                                                                                                                                                                                                                                                                                                                                                                                                                                                                                                                                                                                                                                                                                                                                                                                                             | 12,159    |
| #3 | #1 AND #2                                                                                                                                                                                                                                                                                                                                                                                                                                                                                                                                                                                                                                                                                                                                                                                                                                                                                                                                                                                                                                                                                      | 1,393     |
| #2 | "Nutrition Therapy"[Mesh] OR "Diet"[Mesh] OR diet[tiab] OR diets[tiab] OR dietary[tiab] OR dietet*[tiab] OR nutrition*[tiab]                                                                                                                                                                                                                                                                                                                                                                                                                                                                                                                                                                                                                                                                                                                                                                                                                                                                                                                                                                   | 718,715   |

|    |                                                                                                                                                                |        |
|----|----------------------------------------------------------------------------------------------------------------------------------------------------------------|--------|
| #1 | "Gout"[Mesh] OR gout[tiab] OR gouty[tiab] OR "Hyperuricemia"[Mesh] OR hyperuricem*[tiab] OR hyper-uricem*[tiab] OR hyperuricaem*[tiab] OR hyper-uricaem*[tiab] | 19,640 |
|----|----------------------------------------------------------------------------------------------------------------------------------------------------------------|--------|

## Embase.com Session Results (28 Nov 2017)

/exp = EMtree keyword with explosion

/de = EMtree keyword without explosion

/exp/mj = EMtree keyword with explosion as main topic

:ab,ti,kw = words in title or abstract or author keywords

:ti = words in title

/lim = Limit

| #   | Query                                                                                                                                                                                                                                                                                                                                                                                                                                                                                                                                                                                                                                                                                                                                                                                                                                                                                                                                                                                                                                                                                                  | Results   |
|-----|--------------------------------------------------------------------------------------------------------------------------------------------------------------------------------------------------------------------------------------------------------------------------------------------------------------------------------------------------------------------------------------------------------------------------------------------------------------------------------------------------------------------------------------------------------------------------------------------------------------------------------------------------------------------------------------------------------------------------------------------------------------------------------------------------------------------------------------------------------------------------------------------------------------------------------------------------------------------------------------------------------------------------------------------------------------------------------------------------------|-----------|
| #11 | #10 AND [embase]/lim                                                                                                                                                                                                                                                                                                                                                                                                                                                                                                                                                                                                                                                                                                                                                                                                                                                                                                                                                                                                                                                                                   | 1,444     |
| #10 | #9 NOT ([conference abstract]/lim OR [conference paper]/lim OR [conference review]/lim OR [editorial]/lim)                                                                                                                                                                                                                                                                                                                                                                                                                                                                                                                                                                                                                                                                                                                                                                                                                                                                                                                                                                                             | 1,702     |
| #9  | #8 NOT ([animals]/lim NOT [humans]/lim)                                                                                                                                                                                                                                                                                                                                                                                                                                                                                                                                                                                                                                                                                                                                                                                                                                                                                                                                                                                                                                                                | 2,187     |
| #8  | #6 OR #7                                                                                                                                                                                                                                                                                                                                                                                                                                                                                                                                                                                                                                                                                                                                                                                                                                                                                                                                                                                                                                                                                               | 2,335     |
| #7  | #3 AND #5                                                                                                                                                                                                                                                                                                                                                                                                                                                                                                                                                                                                                                                                                                                                                                                                                                                                                                                                                                                                                                                                                              | 2,102     |
| #6  | #3 AND #4                                                                                                                                                                                                                                                                                                                                                                                                                                                                                                                                                                                                                                                                                                                                                                                                                                                                                                                                                                                                                                                                                              | 587       |
| #5  | 'cardiovascular disease'/exp OR 'cholesterol'/exp OR 'cardiovascular disease*':ab,ti,kw OR cvd:ab,ti,kw OR 'coronary disease*':ab,ti,kw OR 'heart disease*':ab,ti,kw OR atherosclerosis:ab,ti,kw OR arteriosclerosis:ab,ti,kw OR hypertension:ab,ti,kw OR 'blood pressure':ab,ti,kw OR cholesterol*:ab,ti,kw OR stroke*:ab,ti,kw OR 'peripheral vascular disease*':ab,ti,kw OR 'peripheral arterial disease*':ab,ti,kw OR hypercholesterol*:ab,ti,kw OR hyperlipid*:ab,ti,kw OR 'hyper-lipid*':ab,ti,kw OR 'obesity'/exp OR obese*:ab,ti,kw OR overweight*:ab,ti,kw OR obesit*:ab,ti,kw OR 'body mass'/exp OR 'body mass index':ab,ti,kw OR bmi:ab,ti,kw OR 'metabolic disorder'/de OR 'disorders of carbohydrate metabolism'/exp OR 'dyslipidemia'/exp OR 'hyperlipidemia'/exp OR dyslipidemia*:ab,ti,kw OR 'dyslipidemia*':ab,ti,kw OR dyslipidaemia*:ab,ti,kw OR 'dys-lipidaemia*':ab,ti,kw OR 'insulin resistanc*:ab,ti,kw OR 'insuline resistanc*:ab,ti,kw OR Hyperglycemia*:ab,ti,kw OR 'Hyper-glycemia*':ab,ti,kw OR Hyperglycaemia*:ab,ti,kw OR 'Hyper-glycaemia*':ab,ti,kw OR 'cardiovascular | 5,219,831 |

|    |                                                                                                                                                                                |         |
|----|--------------------------------------------------------------------------------------------------------------------------------------------------------------------------------|---------|
|    | event*:ab,ti,kw OR 'cardiovascular risk*:ab,ti,kw OR 'cardio-vascular event*:ab,ti,kw OR 'cardio-vascular risk*:ab,ti,kw                                                       |         |
| #4 | 'uric acid'/exp/mj OR 'uric acid':ti                                                                                                                                           | 14,117  |
| #3 | #1 AND #2                                                                                                                                                                      | 3,112   |
| #2 | 'diet therapy'/exp OR 'diet'/exp OR diet:ab,ti,kw OR diets:ab,ti,kw OR dietary:ab,ti,kw OR dietet*:ab,ti,kw OR nutrition*:ab,ti,kw                                             | 994,946 |
| #1 | 'gout'/exp OR gout:ab,ti,kw OR gouty:ab,ti,kw OR 'hyperuricemia'/exp OR hyperuricem*:ab,ti,kw OR 'hyper-uricem*:ab,ti,kw OR hyperuricaem*:ab,ti,kw OR 'hyper-uricaem*:ab,ti,kw | 34,083  |

## Ebsco / CINAHL Session Results (28 Nov 2017)

MH = descriptors, thesaurus terms  
MM = Subject headings as main topic  
TI = words in title  
AB = words in abstract

| #  | Query                                                                                                                                                                                                                                                                                                                                                                                                                                                                                                                                                                                                                                                                                                                                                                                                                                                                                                             | Results |
|----|-------------------------------------------------------------------------------------------------------------------------------------------------------------------------------------------------------------------------------------------------------------------------------------------------------------------------------------------------------------------------------------------------------------------------------------------------------------------------------------------------------------------------------------------------------------------------------------------------------------------------------------------------------------------------------------------------------------------------------------------------------------------------------------------------------------------------------------------------------------------------------------------------------------------|---------|
| S9 | S8 NOT (MH "Animals" NOT MH "Human")                                                                                                                                                                                                                                                                                                                                                                                                                                                                                                                                                                                                                                                                                                                                                                                                                                                                              | 113     |
| S8 | S6 OR S7                                                                                                                                                                                                                                                                                                                                                                                                                                                                                                                                                                                                                                                                                                                                                                                                                                                                                                          | 116     |
| S7 | S3 AND S5                                                                                                                                                                                                                                                                                                                                                                                                                                                                                                                                                                                                                                                                                                                                                                                                                                                                                                         | 99      |
| S6 | S3 AND S4                                                                                                                                                                                                                                                                                                                                                                                                                                                                                                                                                                                                                                                                                                                                                                                                                                                                                                         | 39      |
| S5 | (MH "Cardiovascular Diseases+") OR (MH "Cholesterol+") OR TI ("cardiovascular disease*" OR cvd OR "coronary disease*" OR "heart disease*" OR atherosclerosis OR arteriosclerosis OR hypertension OR "blood pressure" OR cholesterol* OR stroke* OR "peripheral vascular disease*" OR "peripheral arterial disease*" OR hypercholesterol* OR hyperlipid* OR "hyper-lipid*") OR AB ("cardiovascular disease*" OR cvd OR "coronary disease*" OR "heart disease*" OR atherosclerosis OR arteriosclerosis OR hypertension OR "blood pressure" OR cholesterol* OR stroke* OR "peripheral vascular disease*" OR "peripheral arterial disease*" OR hypercholesterol* OR hyperlipid* OR "hyper-lipid*") OR (MH "Obesity+") OR TI (obese* OR overweight* OR obesit*) OR AB (obese* OR overweight* OR obesit*) OR (MH "Body Mass Index") OR TI ("body mass index" OR bmi) OR AB ("body mass index" OR bmi) OR (MH "Metabolic | 476,303 |

|    |                                                                                                                                                                                                                                                                                                                                                                                                                                                                                                                                                                                                                                                                                                                                          |         |
|----|------------------------------------------------------------------------------------------------------------------------------------------------------------------------------------------------------------------------------------------------------------------------------------------------------------------------------------------------------------------------------------------------------------------------------------------------------------------------------------------------------------------------------------------------------------------------------------------------------------------------------------------------------------------------------------------------------------------------------------------|---------|
|    | Diseases") OR (MH "Glucose Metabolism Disorders+") OR (MH "Hyperlipidemia+") OR TI (dyslipidemia* OR "dys-lipidemia*" OR dyslipidaemia* OR "dys-lipidaemia*" OR "insulin resistanc*" OR "insuline resistanc*" OR Hyperglycemia* OR "Hyper-glycemia*" OR Hyperglycaemia* OR "Hyper-glycaemia*" OR "cardiovascular event*" OR "cardiovascular risk*" OR "cardio-vascular event*" OR "cardio-vascular risk*") OR AB (dyslipidemia* OR "dys-lipidemia*" OR dyslipidaemia* OR "dys-lipidaemia*" OR "insulin resistanc*" OR "insuline resistanc*" OR Hyperglycemia* OR "Hyper-glycemia*" OR Hyperglycaemia* OR "Hyper-glycaemia*" OR "cardiovascular event*" OR "cardiovascular risk*" OR "cardio-vascular event*" OR "cardio-vascular risk*") |         |
| S4 | (MM "Uric Acid") OR TI ("uric acid")                                                                                                                                                                                                                                                                                                                                                                                                                                                                                                                                                                                                                                                                                                     | 640     |
| S3 | S1 AND S2                                                                                                                                                                                                                                                                                                                                                                                                                                                                                                                                                                                                                                                                                                                                | 208     |
| S2 | (MH "Diet Therapy+") OR (MH "Diet+") OR TI (diet OR diets OR dietary OR dietet* OR nutrition*) OR AB (diet OR diets OR dietary OR dietet* OR nutrition*)                                                                                                                                                                                                                                                                                                                                                                                                                                                                                                                                                                                 | 128,159 |
| S1 | (MH "Gout") OR TI (gout OR gouty) OR AB (gout OR gouty) OR (MH "Hyperuricemia") OR TI (hyperuricem* OR "hyper-uricem*" OR hyperuricaem* OR "hyper-uricaem*") OR AB (hyperuricem* OR "hyper-uricem*" OR hyperuricaem* OR "hyper-uricaem*")                                                                                                                                                                                                                                                                                                                                                                                                                                                                                                | 2,305   |

## Wiley / Cochrane Library Session Results (28 Nov 2017)

:ab,ti,kw = words in title or abstract or author keywords

| #  | Query                                                                                                                                                                                                                                                                                                                                                                                                                                                                                                                                               | Results |
|----|-----------------------------------------------------------------------------------------------------------------------------------------------------------------------------------------------------------------------------------------------------------------------------------------------------------------------------------------------------------------------------------------------------------------------------------------------------------------------------------------------------------------------------------------------------|---------|
| #8 | #6 OR #7                                                                                                                                                                                                                                                                                                                                                                                                                                                                                                                                            | 103     |
| #7 | #3 AND #5                                                                                                                                                                                                                                                                                                                                                                                                                                                                                                                                           | 79      |
| #6 | #3 AND #4                                                                                                                                                                                                                                                                                                                                                                                                                                                                                                                                           | 70      |
| #5 | ("cardiovascular disease*" or cvd or "coronary disease*" or "heart disease*" or atherosclerosis or arteriosclerosis or hypertension or "blood pressure" or cholesterol* or stroke* or "peripheral vascular disease*" or "peripheral arterial disease*" or hypercholesterol* or hyperlipid* or "hyper-lipid*" or obese* or overweight* or obesit* or "body mass index" or bmi or dyslipidemia* or "dys-lipidemia*" or dyslipidaemia* or "dys-lipidaemia*" or "insulin resistanc*" or "insuline resistanc*" or Hyperglycemia* or "Hyper-glycemia*" or | 194,760 |

|    |                                                                                                                                                             |        |
|----|-------------------------------------------------------------------------------------------------------------------------------------------------------------|--------|
|    | Hyperglycaemia* or "Hyper-glycaemia*" or "cardiovascular event*" or "cardiovascular risk*" or "cardio-vascular event*" or "cardio-vascular risk*"):ab,ti,kw |        |
| #4 | "uric acid":ab,ti,kw                                                                                                                                        | 2,765  |
| #3 | #1 AND #2                                                                                                                                                   | 114    |
| #2 | (diet or diets or dietary or dietet* or nutrition*):ab,ti,kw                                                                                                | 69,217 |
| #1 | (gout or gouty or hyperuricem* or "hyper-uricem*" or hyperuricaem* or "hyper-uricaem*"):ab,ti,kw                                                            | 1,338  |

The search was updated by one of the authors (DV) on march 1th 2019. Same strategy was used as the search in November 2018.

## PUBMED session result (01-03-2019)

History

[Download history](#) [Clear history](#)

| Search              | Add to builder      | Query                                                                                                                                                                                                                                                                                                                                                                                                                                                                                                                                                                                                                                                                                                                                                                                                                                                                                                                                                                                                                                                                                                                             | Items found             | Time     |
|---------------------|---------------------|-----------------------------------------------------------------------------------------------------------------------------------------------------------------------------------------------------------------------------------------------------------------------------------------------------------------------------------------------------------------------------------------------------------------------------------------------------------------------------------------------------------------------------------------------------------------------------------------------------------------------------------------------------------------------------------------------------------------------------------------------------------------------------------------------------------------------------------------------------------------------------------------------------------------------------------------------------------------------------------------------------------------------------------------------------------------------------------------------------------------------------------|-------------------------|----------|
| <a href="#">#11</a> | <a href="#">Add</a> | Search #8 NOT ("Animals"[Mesh] NOT "Humans"[Mesh]) Sort by: <b>Best Match</b> Filters: <b>Publication date from 2017/11/28 to 2019/02/14</b>                                                                                                                                                                                                                                                                                                                                                                                                                                                                                                                                                                                                                                                                                                                                                                                                                                                                                                                                                                                      | <a href="#">77</a>      | 02:25:19 |
| <a href="#">#10</a> | <a href="#">Add</a> | Search #8 NOT ("Animals"[Mesh] NOT "Humans"[Mesh]) Sort by: <b>Best Match</b> Filters: <b>Publication date from 2017/01/01 to 2019/02/14</b>                                                                                                                                                                                                                                                                                                                                                                                                                                                                                                                                                                                                                                                                                                                                                                                                                                                                                                                                                                                      | <a href="#">127</a>     | 02:23:03 |
| <a href="#">#9</a>  | <a href="#">Add</a> | Search #8 NOT ("Animals"[Mesh] NOT "Humans"[Mesh]) Sort by: <b>Best Match</b>                                                                                                                                                                                                                                                                                                                                                                                                                                                                                                                                                                                                                                                                                                                                                                                                                                                                                                                                                                                                                                                     | <a href="#">935</a>     | 02:22:15 |
| <a href="#">#8</a>  | <a href="#">Add</a> | Search #6 OR #7 Sort by: <b>Best Match</b>                                                                                                                                                                                                                                                                                                                                                                                                                                                                                                                                                                                                                                                                                                                                                                                                                                                                                                                                                                                                                                                                                        | <a href="#">1019</a>    | 02:21:45 |
| <a href="#">#7</a>  | <a href="#">Add</a> | Search #3 AND #5 Sort by: <b>Best Match</b>                                                                                                                                                                                                                                                                                                                                                                                                                                                                                                                                                                                                                                                                                                                                                                                                                                                                                                                                                                                                                                                                                       | <a href="#">798</a>     | 02:21:26 |
| <a href="#">#5</a>  | <a href="#">Add</a> | Search "Cardiovascular Diseases"[Mesh] OR "Cholesterol"[Mesh] OR cardiovascular disease*[tiab] OR cvd[tiab] OR coronary disease*[tiab] OR heart disease*[tiab] OR atherosclerosis[tiab] OR arteriosclerosis[tiab] OR hypertension[tiab] OR blood pressure[tiab] OR cholesterol*[tiab] OR stroke*[tiab] OR peripheral vascular disease*[tiab] OR peripheral arterial disease*[tiab] OR hypercholesterol*[tiab] OR hyperlipid*[tiab] OR hyper-lipid*[tiab] OR "Overweight"[Mesh] OR obese*[tiab] OR overweight*[tiab] OR obesit*[tiab] OR "Body Mass Index"[Mesh] OR "body mass index"[tiab] OR bmi [tiab] OR "Metabolic Diseases"[Mesh:noexp] OR "Glucose Metabolism Disorders"[Mesh] OR "Dyslipidemias"[Mesh] OR dyslipidemia*[tiab] OR dys-lipidemia*[tiab] OR dyslipidaemia*[tiab] OR dys-lipidaemia*[tiab] OR insulin resistanc*[tiab] OR insuline resistanc*[tiab] OR Hyperglycemia*[tiab] OR Hyper-glycemia*[tiab] OR Hyperglycaemia*[tiab] OR Hyper-glycaemia*[tiab] OR cardiovascular event*[tiab] OR cardiovascular risk*[tiab] OR cardio-vascular event*[tiab] OR cardio-vascular risk*[tiab] Sort by: <b>Best Match</b> | <a href="#">3465083</a> | 02:21:22 |
| <a href="#">#6</a>  | <a href="#">Add</a> | Search #3 AND #4 Sort by: <b>Best Match</b>                                                                                                                                                                                                                                                                                                                                                                                                                                                                                                                                                                                                                                                                                                                                                                                                                                                                                                                                                                                                                                                                                       | <a href="#">450</a>     | 02:21:09 |
| <a href="#">#4</a>  | <a href="#">Add</a> | Search "Uric Acid"[Majr] OR uric acid[ti] Sort by: <b>Best Match</b>                                                                                                                                                                                                                                                                                                                                                                                                                                                                                                                                                                                                                                                                                                                                                                                                                                                                                                                                                                                                                                                              | <a href="#">12856</a>   | 02:21:08 |
| <a href="#">#3</a>  | <a href="#">Add</a> | Search #1 AND #2 Sort by: <b>Best Match</b>                                                                                                                                                                                                                                                                                                                                                                                                                                                                                                                                                                                                                                                                                                                                                                                                                                                                                                                                                                                                                                                                                       | <a href="#">1518</a>    | 02:20:30 |
| <a href="#">#2</a>  | <a href="#">Add</a> | Search "Nutrition Therapy"[Mesh] OR "Diet"[Mesh] OR diet[tiab] OR diets[tiab] OR dietary[tiab] OR dietet*[tiab] OR nutrition*[tiab] Sort by: <b>Best Match</b>                                                                                                                                                                                                                                                                                                                                                                                                                                                                                                                                                                                                                                                                                                                                                                                                                                                                                                                                                                    | <a href="#">770670</a>  | 02:20:29 |
| <a href="#">#1</a>  | <a href="#">Add</a> | Search "Gout"[Mesh] OR gout[tiab] OR gouty[tiab] OR "Hyperuricemia"[Mesh] OR hyperuricem*[tiab] OR hyper-uricem*[tiab] OR hyperuricaem*[tiab] OR hyper-uricaem*[tiab] Sort by: <b>Best Match</b>                                                                                                                                                                                                                                                                                                                                                                                                                                                                                                                                                                                                                                                                                                                                                                                                                                                                                                                                  | <a href="#">21205</a>   | 02:20:28 |

## Cochrane library session result ( 01-03-2019 )

|   |   |    |                                                                                                                                                                                                                                                                                                                                                                                                                                                                                                                                                                                                                                                                                                                                                                                                                      |                   |        |
|---|---|----|----------------------------------------------------------------------------------------------------------------------------------------------------------------------------------------------------------------------------------------------------------------------------------------------------------------------------------------------------------------------------------------------------------------------------------------------------------------------------------------------------------------------------------------------------------------------------------------------------------------------------------------------------------------------------------------------------------------------------------------------------------------------------------------------------------------------|-------------------|--------|
| − | + | #1 | (gout or gouty or <u>hyperuricem</u> * or "hyper-uricem"" or <u>hyperuricaem</u> * or "hyper-uricaem"" ) <u>ab,ti,kw</u>                                                                                                                                                                                                                                                                                                                                                                                                                                                                                                                                                                                                                                                                                             | Limits            | 1642   |
| − | + | #2 | (diet or diets or dietary or <u>dietet</u> * or nutrition*) <u>ab,ti,kw</u>                                                                                                                                                                                                                                                                                                                                                                                                                                                                                                                                                                                                                                                                                                                                          | Limits            | 80279  |
| − | + | #3 | #1 AND #2                                                                                                                                                                                                                                                                                                                                                                                                                                                                                                                                                                                                                                                                                                                                                                                                            | Limits            | 156    |
| − | + | #4 | "uric acid" <u>ab,ti,kw</u>                                                                                                                                                                                                                                                                                                                                                                                                                                                                                                                                                                                                                                                                                                                                                                                          | Limits            | 3032   |
| − | + | #5 | ("cardiovascular disease"" or <u>cvd</u> or "coronary disease"" or "heart disease"" or atherosclerosis or arteriosclerosis or hypertension or "blood pressure" or cholesterol* or stroke* or "peripheral vascular disease"" or "peripheral arterial disease"" or <u>hypercholesterol</u> * or <u>hyperlipid</u> * or "hyper-lipid"" or obese* or overweight* or <u>obesit</u> * or "body mass index" or <u>bmi</u> or dyslipidemia* or " <u>dys-lipidemia</u> " or <u>dyslipidaemia</u> * or " <u>dys-lipidaemia</u> " or "insulin <u>resistan</u> "* or " <u>insuline resistan</u> "* or Hyperglycemia* or " <u>Hyper-glycemia</u> " or <u>Hyperglycaemia</u> * or "Hyper-glycaemia"" or "cardiovascular event"" or "cardiovascular risk"" or "cardio-vascular event"" or "cardio-vascular risk"" ) <u>ab,ti,kw</u> | Limits            | 212670 |
| − | + | #6 | #3 AND #4                                                                                                                                                                                                                                                                                                                                                                                                                                                                                                                                                                                                                                                                                                                                                                                                            | Limits            | 96     |
| − | + | #7 | #3 AND #5                                                                                                                                                                                                                                                                                                                                                                                                                                                                                                                                                                                                                                                                                                                                                                                                            | Limits            | 100    |
| − | + | #8 | #6 OR #7                                                                                                                                                                                                                                                                                                                                                                                                                                                                                                                                                                                                                                                                                                                                                                                                             | Limits            | 136    |
| − | + | #9 | Type a search term or use the S or MeSH buttons to compose                                                                                                                                                                                                                                                                                                                                                                                                                                                                                                                                                                                                                                                                                                                                                           | S ▼ MeSH ▼ Limits | N/A    |

✕ Clear all

☐ Highlight orphan lines
